# Supplementary material for: Multidisciplinary lines of evidence reveal East/Northeast Asian origins of agriculturalist/pastoralist residents at a Han dynasty military outpost in ancient Xinjiang
Source: Frontiers journal article supplement (doi:10.3389/fevo.2022.932004), 2022-08-10
Supplement: Table_7.XLSX [file Table_7.XLSX]

## Sheet: Sheet1
Suppplementary Table S7. The admixture modelings of Shichengzi groups. For modeling, we use ANA( Mongolia_N_North, Mongolia_N_East and Ulaanzuukh_SlabGrave), Sintashta and YR_LN as sources to model the admixture of Shichengzi at the levels of group and per individual. Models with P-value >0.05 provided an adequate model fit, and were highlighted in bold font, and the models with p>0.05 but propor…
group
			Outgroup = Base				Base+YR_LN		Base+Mongolia_N_North
Target	Ref1	Ref2	Pval	CoefRef1	CoefRef2	Pval	CoefRef1	CoefRef2	Pval	CoefRef1	CoefRef2
Shichengzi_A	YR_LN		0.0005						1.83465e-05
		Russia_MLBA_Sintashta	0.0031	0.933±0.027	0.067±0.027				1.00952e-05	0.989±0.024	0.011±0.024
		Ami.DG	0.0327	2.275±0.683	-1.275±0.683				0.0481	2.098±0.374	-1.098±0.374
	Ulaanzuukh_SlabGrave		0.5368			0.5606			0.0063
		Russia_MLBA_Sintashta	0.4466	0.998±0.027	0.002±0.027	0.5029	0.988±0.022	0.012±0.022	0.0272	0.947±0.022	0.053±0.022
		Ami.DG	0.4495	1.025±0.150	-0.025±0.150	0.4835	1.039±0.151	-0.039±0.151	0.134	0.742±0.079	0.258±0.079
	Mongolia_N_East		0.0577			0.0847
		Russia_MLBA_Sintashta	0.0525	0.031±0.031	0.969±0.031	0.0766	0.023±0.025	0.977±0.025
		Ami.DG	0.5323	0.035±0.026	0.965±0.026	0.0591	-0.021±0.220	1.021±0.220
	Mongolia_N_North		0.4561			0.5401
		Russia_MLBA_Sintashta	0.5323	0.035±0.026	0.965±0.026	0.6031	0.028±0.022	0.972±0.022
		Ami.DG	0.5481	-0.241±0.210	1.241±0.210	0.6435	-0.240±0.204	1.240±0.204
Shichengzi_B	YR_LN		0.3913						0.4322
		Russia_MLBA_Sintashta	0.3091	0.999±0.019	0.001±0.019				0.366	0.993±0.016	0.007±0.016
		Ami.DG	0.8114	0.649±0.158	0.351±0.158				0.8064	0.739±0.117	0.261±0.117
	Ulaanzuukh_SlabGrave		5.9e-05			1.15946e-13			4.5153e-28
		Russia_MLBA_Sintashta	0.0034	1.069±0.020	-0.069±0.020	9.20399e-05	1.110±0.016	-0.110±0.016	4.74649e-25	0.937±0.015	0.063±0.015
		Ami.DG	0.5705	0.418±0.115	0.582±0.115	3.53509e-07	0.216±0.225	0.784±0.225	0.5723	0.323±0.056	0.677±0.056
	Mongolia_N_East		0.0063			3.80257e-10
		Russia_MLBA_Sintashta	0.0201	-0.047±0.022	1.047±0.022	0.0003	-0.100±0.018	1.100±0.018
		Ami.DG	0.4618	0.554±0.142	0.446±0.142	1.7851e-07	1.104±0.525	-0.104±0.525
	Mongolia_N_North		0.0024			2.04193e-15
		Russia_MLBA_Sintashta	0.0219	-0.055±0.020	1.055±0.020	1.39282e-05	-0.115±0.016	1.115±0.016
		Ami.DG	0.6456	0.545±0.124	0.455±0.124	1.65844e-07	1.038±0.316	-0.038±0.316
per-individual
			Outgroup = Mbuti.DG Onge.DG Yana_UP.SG Loschbour.DG Iran_GanjDareh_N Turkmenistan_Gonur_BA_1 Kazakhstan_Eneolithic_Botai.SG AR19K Liangdao2 Miaozigou_MN Japan_Jomon				Outgroup+YR_LN		Outgroup+Mongolia_N_North
Target	Ref1	Ref2	Pval	CoefRef1	CoefRef2	Pval	CoefRef1	CoefRef2	Pval	CoefRef1	CoefRef2
M1	YR_LN		0.1872						0.0422
		Russia_MLBA_Sintashta	0.1476	0.981±0.034	0.019±0.034				0.0387	1.028±0.028	-0.028±0.028
		Ami.DG	0.5893	2.406±1.167	-1.406±1.167				0.6269	1.945±0.418	-0.945±0.418
	Ulaanzuukh_SlabGrave		0.7484			0.7012			0.2093
		Russia_MLBA_Sintashta	0.8093	1.040±0.034	-0.040±0.034	0.6239	1.005±0.026	-0.005±0.026	0.1821	0.980±0.027	0.020±0.027
		Ami.DG	0.6843	0.917±0.211	0.083±0.211	0.621	0.983±0.217	0.017±0.217	0.6647	0.746±0.097	0.254±0.097
	Mongolia_N_East		0.5105			0.4546
		Russia_MLBA_Sintashta	0.4597	-0.026±0.040	1.0266±0.04	0.3772	0.992±0.031	0.008±0.031
		Ami.DG	0.4329	0.093±0.308	0.907±0.308	0.3734	1.027±0.342	-0.027±0.342
	Mongolia_N_North		0.9455			0.8866
		Russia_MLBA_Sintashta	0.9189	-0.013±0.035	1.0133±0.035	0.8552	0.985±0.027	0.015±0.027
		Ami.DG	0.9196	-0.086±0.241	1.0866±0.241	0.8791	1.167±0.250	-0.167±0.250
M4	YR_LN		0.0008						0.0005
		Russia_MLBA_Sintashta	0.0381	0.858±0.040	0.142±0.04				0.0025	0.915±0.037	0.085±0.037
		Ami.DG	0.064	2.345±0.691	-1.345±0.691				0.0971	2.332±0.602	-1.332±0.602
	Ulaanzuukh_SlabGrave		0.0575			0.0838			0.0018
		Russia_MLBA_Sintashta	0.1151	0.923±0.041	0.077±0.041	0.1099	0.948±0.036	0.052±0.036	0.0556	0.881±0.035	0.119±0.035
		Ami.DG	0.0904	1.349±0.273	-0.349±0.273	0.1295	1.350±0.274	-0.350±0.274	0.0027	0.786±0.159	0.214±0.159
	Mongolia_N_East		0.082			0.0845
		Russia_MLBA_Sintashta	0.2111	0.099±0.046	0.901±0.046	0.0874	0.954±0.040	0.046±0.040
		Ami.DG	0.0906	-0.291±0.325	1.2911±0.325	0.0844	1.251±0.320	-0.251±0.320
	Mongolia_N_North		0.0161			0.0194
		Russia_MLBA_Sintashta	0.1233	0.116±0.041	0.884±0.041	0.0421	0.929±0.037	0.071±0.037
		Ami.DG	0.2463	-1.084±0.609	2.0844±0.609	0.2213	2.060±0.635	-1.060±0.635
M3	YR_LN		0.1991						0.2256
		Russia_MLBA_Sintashta	0.1725	1.018±0.024	-0.018±0.024				0.1721	1.004±0.020	-0.004±0.020
		Ami.DG	0.4592	0.587±0.209	0.413±0.209				0.5167	0.657±0.164	0.343±0.164
	Ulaanzuukh_SlabGrave		0.0005			1.48522e-09			3.35982e-16
		Russia_MLBA_Sintashta	0.0329	1.090±0.026	-0.090±0.026	0.0085	1.128±0.021	-0.128±0.021	1.39298e-15	0.955±0.020	0.045±0.020
		Ami.DG	0.2991	0.383±0.147	0.617±0.147	1.88664e-05	0.221±0.248	0.779±0.248	0.3401	0.296±0.077	0.704±0.077
	Mongolia_N_East		0.059			2.12658e-05
		Russia_MLBA_Sintashta	0.1409	-0.056±0.028	1.0566±0.028	0.038	1.100±0.022	-0.100±0.022
		Ami.DG	0.328	0.524±0.207	0.476±0.207	1.30099e-05	0.752±2.547	0.248±2.547
	Mongolia_N_North		0.0011			6.01239e-12
		Russia_MLBA_Sintashta	0.033	-0.081±0.025	1.0811±0.025	0.0007	1.136±0.021	-0.136±0.021
		Ami.DG	0.3282	0.612±0.151	0.388±0.151	1.02187e-05	-0.028±0.280	1.028±0.280
M9	YR_LN		0.2008						0.2623
		Russia_MLBA_Sintashta	0.2245	0.965±0.028	0.035±0.028				0.2858	0.972±0.023	0.028±0.023
		Ami.DG	0.1535	0.885±0.393	0.115±0.393				0.2128	0.905±0.234	0.095±0.234
	Ulaanzuukh_SlabGrave		0.0139			1.22168e-05			3.26468e-11
		Russia_MLBA_Sintashta	0.0195	1.045±0.029	-0.045±0.029	0.0035	1.092±0.023	-0.092±0.023	1.70945e-09	0.926±0.023	0.074±0.023
		Ami.DG	0.101	0.549±0.205	0.451±0.205	0.0012	0.298±0.312	0.702±0.312	0.1023	0.374±0.087	0.626±0.087
	Mongolia_N_East		0.04			2.16302e-05
		Russia_MLBA_Sintashta	0.0438	-0.042±0.034	1.0422±0.034	0.0042	1.105±0.028	-0.105±0.028
		Ami.DG	0.056	0.372±0.374	0.628±0.374	0.0006	-0.081±0.515	1.081±0.515
	Mongolia_N_North		0.0018			5.53953e-07
		Russia_MLBA_Sintashta	0.0011	-0.017±0.031	1.0177±0.031	4.48859e-05	1.081±0.024	-0.081±0.024
		Ami.DG	0.0093	0.713±0.603	0.287±0.603	0.0011	-0.400±0.633	1.400±0.633
